# Supplementary material
Source: PubMed Central journal article supplement (PMC97568)
Supplement: nar_29_24_4983__1.pdf [file nar_29_24_4983__1.pdf]

## SUPPLEMENTARY MATERIAL

**Table S1.** Supplemental data for transcription factors in the developing retina

| Gene Name                                                       | Type             | ESTs | ID #    |
|-----------------------------------------------------------------|------------------|------|---------|
| TRANSCRIPTION INTERMEDIARY FACTOR 1-BETA (KRIP-1/TIF1B)         | GTF              | 14   | 0104-10 |
| transcription factor Math5                                      | bHLH             | 13   | 0232-39 |
| TRANSCRIPTION ACTIVATOR (SNF2-BETA/BRG-1)                       | GTF              | 9    | 0221-87 |
| KRAB-containing zinc-finger protein KRAZ1                       | zinc finger      | 7    | 0174-69 |
| hairy/enhancer of split 6 (HES6)                                | bHLH             | 6    | 2071-37 |
| CARG-BINDING FACTOR-A (CBF-A)                                   |                  | 5    | 2072-84 |
| transcriptional activator/zinc finger protein ZAC1              | zinc finger      | 5    | 2034-74 |
| retina-specific transcription factor Chx10 (HOMEBOX PROTEIN)    | homeobox         | 5    | 0612-13 |
| TRANSCRIPTION FACTOR BTF3                                       |                  | 5    | 0243-37 |
| TRANSCRIPTION FACTOR SOX11                                      | HMG              | 5    | 0242-92 |
| LIM-homeodomain protein apterous/mLHX2 (interacts with mrg1)    | LIM-homeo        | 4    | 2103-04 |
| DNA-BINDING PROTEIN HTF4/E-BOX-BINDING PROTEIN (ALF1/ME1)       | bHLH             | 4    | 0243-95 |
| growth hormone transcription factor Zn-15/Zn-16                 | zinc finger      | 4    | 0233-86 |
| Math4a/Neurogenin-2                                             | bHLH             | 4    | 0174-56 |
| PAX6 (paired box containing gene)                               | paired box       | 4    | 0084-46 |
| retina-derived POU-domain factor-1 (RPF-1)                      | POU              | 3    | 2111-70 |
| HOMEBOX PROTEIN SIX3                                            | homeobox         | 3    | 2062-63 |
| cAMP-DEPENDENT TRANSCRIPTION FACTOR ATF-4 (TAXREB67 HOMOLOG)    | bZIP             | 3    | 2042-77 |
| MYB PROTO-ONCOGENE PROTEIN (C-MYB)                              | bZIP             | 3    | 0263-52 |
| TAR DNA-binding protein-43 (TDP-43)                             |                  | 3    | 0252-03 |
| general transcription factor 2-I (TFII-I/BAP-135)               | GTF              | 3    | 0233-72 |
| APOPTOSIS RESPONSE ZINC FINGER PROTEIN REQUIEM (UBI-D4)         | zinc finger      | 3    | 0224-14 |
| bromodomain PHD finger transcription factor BPTF                |                  | 3    | 0194-46 |
| Creb-related protein (Creb-rp)                                  | bZIP             | 3    | 0192-09 |
| TRANSCRIPTIONAL ENHANCER FACTOR TEF-4 (ETEF-1/TEAD-2)           |                  | 3    | 0191-16 |
| splicing factor PSF/p54NRB (octamer-binding protein)            |                  | 3    | 0182-91 |
| MAZR (Myc-associated zinc finger/MAZ-related factor)            | zinc finger      | 3    | 0174-22 |
| TRANSCRIPTION FACTOR-LIKE PROTEIN MRGX                          |                  | 3    | 0123-64 |
| X box binding protein-1 (HTF/TREB5)                             |                  | 3    | 0113-29 |
| nuclear receptor co-repressor N-CoR                             | GTF              | 3    | 0112-06 |
| homeobox gene of the sine oculis-Six Six6 (Optx2)               | homeobox         | 3    | 0111-08 |
| TBP-associated factor 172 (TAFII170)                            | GTF              | 3    | 0084-31 |
| FUSE (far upstream element of c-myc) binding protein FBP        |                  | 3    | 0082-33 |
| ZINC FINGER PROTEIN HRX (MLL/TRITHORAX-LIKE PROTEIN ALL-1)      | zinc finger      | 3    | 0052-61 |
| muscle TFII-I repeat domain-containing protein 1 (GTF2IRD1/BEN) |                  | 2    | 2124-50 |
| transcription factor AP-2                                       | bZIP             | 2    | 2121-52 |
| SIGNAL TRANSDUCER AND ACTIVATOR OF TRANSCRIPTION 5B             | stat             | 2    | 2114-12 |
| ETS-RELATED TRANSCRIPTION FACTOR ELF-2 (ELF2)                   | ETS              | 2    | 2112-12 |
| TBP-ASSOCIATED FACTOR 250KD (TAFII250)                          | GTF              | 2    | 2112-03 |
| KRUEPPEL-LIKE FACTOR 7 KLF7 (UBIQUITOUS KRUEPPEL-LIKE FACTOR)   | zinc finger      | 2    | 2101-26 |
| metal response element DNA-binding protein M96 (ZiRF1)          |                  | 2    | 2094-72 |
| nuclear protein np95 (related to transcription factor ICBP90)   |                  | 2    | 2072-94 |
| zinc finger transcription factor Roaz                           | zinc finger      | 2    | 2041-67 |
| PRE-B-CELL LEUKEMIA TRANSCRIPTION FACTOR/HOMEBOX PROTEIN PBX3   | homeobox         | 2    | 0694-31 |
| COUP TRANSCRIPTION FACTOR 1 (COUP-TF1/ear-3)                    | nuclear receptor | 2    | 0693-33 |
| bZIP protein LZIP-2                                             | bZIP             | 2    | 0611-96 |
| ZINC FINGER PROTEIN 35 (ZFP-35)                                 | zinc finger      | 2    | 0272-28 |
| ZINC FINGER PROTEIN 90 (ZFP-90/NK10)                            | zinc finger      | 2    | 0271-28 |
| INTERLEUKIN ENHANCER-BINDING FACTOR 1 (ILF-1)                   |                  | 2    | 0263-42 |
| retinoid-related orphan receptor (ROR) beta/ROR-BETA            | nuclear receptor | 2    | 0242-86 |
| Tat transcriptional coactivator CA150                           | GTF              | 2    | 0242-49 |
| transcription factor IIIC alpha-subunit (TFIIIC-alpha)          |                  | 2    | 0241-69 |
| grg1 (Groucho-related gene/transducin-like enhancer protein)    |                  | 2    | 0234-48 |
| J KAPPA RS-BINDING PROTEIN (SUPPRESSOR OF HAIRLESS)             |                  | 2    | 0233-07 |
| transcription factor LBP-1a/NF2d9                               |                  | 2    | 0223-48 |
| HELIX-LOOP-HELIX PROTEIN 2 (HEN2/NSCL-2)                        | bHLH             | 2    | 0193-72 |
| REGULATORY PROTEIN TSC-22 (TGFB STIMULATED CLONE 22)            |                  | 2    | 0192-40 |
| NEUROGENIC DIFFERENTIATION FACTOR 1 (BHF-1/NeuroD)              | bHLH             | 2    | 0191-69 |
| transcription repressor ZFM1/splicing factor SF1                |                  | 2    | 0173-59 |

Table S1. Continued

|                                                                 |             |   |         |
|-----------------------------------------------------------------|-------------|---|---------|
| transcriptional activator (BRG1/SNF2)                           | GTF         | 2 | 0172-21 |
| putative transcription factor CA150                             |             | 2 | 0122-72 |
| GRG PROTEIN (ESP1/AES-2/Groucho-related gene)                   |             | 2 | 0114-31 |
| TRANSCRIPTION FACTOR HES-5 (HAIRY AND ENHANCER OF SPLIT 5)      | bHLH        | 2 | 0113-49 |
| myelin transcription factor 1 (Myt1)                            |             | 2 | 0102-65 |
| TRANSCRIPTION FACTOR HES-1 (HAIRY AND ENHANCER OF SPLIT 1)      | bHLH        | 2 | 0101-39 |
| core promoter binding protein CPBP                              |             | 2 | 0084-84 |
| similar to Drosophila ash2                                      | bHLH        | 2 | 0081-73 |
| TRANSCRIPTION INITIATION FACTOR IIE BETA SUBUNIT                | GTF         | 2 | 0054-50 |
| zinc finger transcription factor spalt-like protein msal-2      | zinc finger | 2 | 0054-40 |
| Sex comb on midleg homolog scmh1 (a Polycomb-group protein)     |             | 2 | 0051-41 |
| HOMEBOX PROTEIN DLX-1                                           | homeobox    | 1 | 2123-87 |
| rax/rx (retina and anterior neural fold homeobox gene)          | homeobox    | 1 | 2113-28 |
| CYCLIC-AMP-DEPENDENT TRANSCRIPTION FACTOR ATF-5/ATFX            |             | 1 | 2112-73 |
| PSE-BINDING FACTOR DELTA SUBUNIT (PTF delta/SNAP45 homolog)     |             | 1 | 2104-73 |
| calcineurin-dependent transcription complex subunit NF-ATc4     | NFAT        | 1 | 2102-19 |
| TRANSCRIPTION INITIATION FACTOR IIF (TFIIF-BETA/RAP30)          | GTF         | 1 | 2101-67 |
| teashirt 2 (tsh2)                                               | zinc finger | 1 | 2101-33 |
| FORKHEAD-RELATED PROTEIN FKHL1 (TRANSCRIPTION FACTOR BF-1)      | forkhead    | 1 | 2093-54 |
| ATONAL PROTEIN HOMOLOG 3 (HELIX-LOOP-HELIX PROTEIN MATH-3)      | bHLH        | 1 | 2092-58 |
| CpG binding protein (CGBP/PCCX1 has PHD finger/CXXC domain)     |             | 1 | 2084-85 |
| Max-interacting protein MGA (has bHLHZip motif/T-box domain)    | bHLH/T box  | 1 | 2084-81 |
| ETS-RELATED TRANSCRIPTION FACTOR ELF-1 (E74-LIKE FACTOR 1)      | ETS         | 1 | 2084-75 |
| HCF-binding transcription factor Zhangfei                       |             | 1 | 2082-32 |
| METAL RESPONSIVE ELEMENT BINDING TRANSCRIPTION FACTOR MTF-1     |             | 1 | 2081-19 |
| transcription factor C1/HCF (VP16 ACCESSORY PROTEIN)            |             | 1 | 2074-77 |
| TBP-related factor (TLF/TRF2)                                   | GTF         | 1 | 2063-37 |
| UPSTREAM STIMULATORY FACTOR 1 (USF1 BINDS E-BOX SEQUENCE)       |             | 1 | 2062-23 |
| FHX/KIAA1041/FOXJ2 forkhead factor                              | forkhead    | 1 | 2061-51 |
| ash1 (trithorax group gene/absent, small, or homeotic 1)        |             | 1 | 2054-12 |
| SKI ONCOGENE (C-SKI)                                            |             | 1 | 2053-74 |
| B-CELL REGULATOR OF IgH TRANSCRIPTION BRIGHT (DEAD RINGER LIKE) |             | 1 | 2052-35 |
| Pituitary tumor-transforming gene (PTTG activates c-Myc)        |             | 1 | 2044-24 |
| checkpoint suppressor 1 CHES1 (FORKHEAD domain)                 | forkhead    | 1 | 2043-07 |
| TATA-binding protein (TBP)-interacting protein TIP120B          | GTF         | 1 | 2041-38 |
| transcription factor IIIc63 (TFIIIC63)                          | GTF         | 1 | 2034-85 |
| transcription factor SOX8                                       | HMG         | 1 | 2032-95 |
| TRANSCRIPTION FACTOR DP-1 (E2F DIMERIZATION PARTNER 1)          |             | 1 | 2031-09 |
| ENHANCER OF ZESTE HOMOLOG 2 (ENX-1/Polycomb group gene)         |             | 1 | 2024-01 |
| retinoblastoma-interacting zinc-finger gene RIZ                 | zinc finger | 1 | 2023-09 |
| B lymphocyte-induced maturation protein-1 (Blimp-1/PRDI-BF1)    |             | 1 | 2022-67 |
| SOX9 transcription factor                                       | HMG         | 1 | 2013-54 |
| NUCLEAR FACTOR OF ACTIVATED T-CELLS (NFAT4/NFATx)               | NFAT        | 1 | 2012-19 |
| HOMEBOX PROTEIN DLX-2 (HOMEBOX PROTEIN TES-1)                   | homeobox    | 1 | 2012-16 |
| LIM-homeodomain transcription factor islet1                     | LIM-homeo   | 1 | 0823-63 |
| TBP-associated factor TAFI95                                    | GTF         | 1 | 0822-77 |
| homeobox gene Cut alternatively spliced product (CASP)          | homeobox    | 1 | 0822-63 |
| TRANSCRIPTION ELONGATION FACTOR S-II                            | GTF         | 1 | 0694-92 |
| hepatocyte nuclear factor 6 (HNF-6)                             |             | 1 | 0691-86 |
| TSC22-related inducible leucine zipper 2                        | bHLH        | 1 | 0613-85 |
| HOMEBOX PROTEIN PBX2                                            | homeobox    | 1 | 0613-53 |
| E2F-like transcriptional repressor protein                      |             | 1 | 0611-91 |
| Kruppel-type zinc finger protein ZBP-99                         | zinc finger | 1 | 0611-24 |
| homolog of TRANSCRIPTION FACTOR JUN-D                           | bZIP        | 1 | 0273-68 |
| general transcription elongation factor Tat-SF1                 |             | 1 | 0273-40 |
| cyclin D-binding Myb-like transcription factor DMP1             | bZIP        | 1 | 0271-32 |
| Drosophila prospero homolog prox 1/CLE7 (homeobox gene)         | homeobox    | 1 | 0263-67 |
| FORKHEAD BOX PROTEIN K1 (MYOCYTE NUCLEAR FACTOR/MNF)            | forkhead    | 1 | 0262-75 |
| zinc finger/leucine zipper protein AF10                         | zinc finger | 1 | 0261-83 |
| zinc finger protein 62 (Zfp62)                                  | zinc finger | 1 | 0261-51 |
| DNA-BINDING PROTEIN MEL-18 (a mammalian Polycomb group gene)    |             | 1 | 0254-83 |

Table S1. Continued

|                                                                 |                  |   |         |
|-----------------------------------------------------------------|------------------|---|---------|
| SP1-like zinc finger transcription factor (FKLF homolog)        | zinc finger      | 1 | 0254-65 |
| STEROL REGULATORY ELEMENT BINDING PROTEIN-2 (SREBP-2)           |                  | 1 | 0242-59 |
| COUP TRANSCRIPTION FACTOR 2 (COUP-TF2/ARP-1)                    | nuclear receptor | 1 | 0242-32 |
| glucocorticoid modulatory element binding protein 1 (GMEB-1)    |                  | 1 | 0242-30 |
| transcription factor Sp1                                        | zinc finger      | 1 | 0233-17 |
| Rel domain-containing transcription factor NFAT5                | NFAT             | 1 | 0233-14 |
| erythroid transcription factor FKLF-2/BTEB3                     | zinc finger      | 1 | 0232-55 |
| transcription factor TBX3 (T box protein)                       | T box            | 1 | 0232-17 |
| co-repressor protein mSin3B                                     | GTF              | 1 | 0221-61 |
| ZINC FINGER PROTEIN 38 (ZFP-38/RU49/Zipro1)                     | zinc finger      | 1 | 0221-47 |
| Myelin transcription factor zinc finger protein (MyT3/NZF-3)    | zinc finger      | 1 | 0194-25 |
| zinc finger transcription factor/AE-1 binding protein AEBP2     | zinc finger      | 1 | 0194-06 |
| maternal transcript Maid (negative regulator of bHLH factor)    | bHLH             | 1 | 0192-89 |
| SIGNAL TRANSDUCER AND ACTIVATOR OF TRANSCRIPTION 5A (Stat5a)    | stat             | 1 | 0192-30 |
| Human Sp2 homolog                                               | zinc finger      | 1 | 0192-25 |
| nuclear factor I-A2 (NFIA)                                      | bHLH-ZIP         | 1 | 0192-13 |
| SL3-3 ENHANCER FACTOR 2 (SEF-2/ITF-2)                           |                  | 1 | 0182-85 |
| transcription factor TFIID 230 kda subunit (Taf250)             |                  | 1 | 0182-13 |
| NF45 (45-kDa subunit of NF-AT)                                  | NFAT             | 1 | 0181-46 |
| TRANSCRIPTION FACTOR MAFG OF BZIP FAMILY (basic-leucine zipper) | bZIP             | 1 | 0174-39 |
| TRANSCRIPTION FACTOR JUN-D                                      | bZIP             | 1 | 0172-28 |
| TRANSCRIPTIONAL REPRESSOR CTCF (C-MYC PROMOTER BINDING)         | bHLH             | 1 | 0171-73 |
| deformed epidermal autoregulatory factor 1 (DEAF-1/NUDR)        |                  | 1 | 0171-30 |
| Smad1 (mothers-against-dpp-related-1)                           | smad             | 1 | 0123-56 |
| LIM-type homeobox gene islet-2                                  | LIM-homeo        | 1 | 0123-13 |
| helix-loop-helix DNA binding protein regulator (Id)             | bHLH             | 1 | 0122-61 |
| putative transcription factor Vezf1/DB1                         |                  | 1 | 0121-26 |
| transcription regulator Sin3A                                   |                  | 1 | 0121-20 |
| iroquois-class homeobox protein Irx6                            | homeobox         | 1 | 0114-80 |
| HYPOXIA-INDUCIBLE FACTOR 1 ALPHA (HIF-1 ALPHA)                  |                  | 1 | 0114-33 |
| transcription factor OC-2 (ONECUT homeodomain class)            | homeobox         | 1 | 0112-31 |
| TRANSCRIPTION FACTOR DP-2 (E2F DIMERIZATION PARTNER 2)          |                  | 1 | 0104-61 |
| ZINC FINGER PROTEIN GLI1                                        | zinc finger      | 1 | 0103-63 |
| myelin transcription factor 1-like (Png-1/NZF-1)                |                  | 1 | 0102-76 |
| CCAAT binding transcription factor CBF-C/NFY-C                  |                  | 1 | 0102-06 |
| ZINC FINGER PROTEIN ZIC1                                        | zinc finger      | 1 | 0084-89 |
| SMAD5                                                           | smad             | 1 | 0084-69 |
| ORPHAN NUCLEAR RECEPTOR TR2                                     | nuclear receptor | 1 | 0082-22 |
| transcriptional repressor RP58/Translin Associated Zinc Finger  | zinc finger      | 1 | 0081-24 |
| T-box transcription factor tbx20                                | T box            | 1 | 0054-10 |
| Btf (Bcl-2-associated transcription factor)                     |                  | 1 | 0053-37 |
| Y-BOX TRANSCRIPTION FACTOR (CBF-A/EFI-A)                        |                  | 1 | 0053-25 |
| HOMEBOX PROTEIN PBX1                                            | homeobox         | 1 | 0052-40 |
| MYB-RELATED PROTEIN B (B-MYB)                                   | bZIP             | 1 | 0051-24 |
| MYB-RELATED PROTEIN A (A-MYB)                                   | bZIP             | 1 | 0051-13 |

Table S2. Supplemental data for signaling molecules in the developing retina

| Gene                                                            | EST | ID#     |
|-----------------------------------------------------------------|-----|---------|
| 14-3-3 PROTEIN EPSILON (PROTEIN KINASE C INHIBITOR PROTEIN-1)   | 21  | 2051-63 |
| secreted frizzled related protein 2 (Sarp1/sFRP-2/SDF5)         | 20  | 0612-96 |
| calmodulin                                                      | 15  | 0173-77 |
| 14-3-3 protein theta protein                                    | 13  | 0694-19 |
| beta catenin                                                    | 10  | 0242-81 |
| NEUROMODULIN (AXONAL MEMBRANE PROTEIN GAP-43)                   | 6   | 2114-90 |
| DOUBLECORTIN (LISSENCEPHALIN-X)                                 | 6   | 2074-73 |
| RAB GDP DISSOCIATION INHIBITOR BETA (GDI-2)                     | 6   | 2043-44 |
| Ulip (UNC-33-LIKE PHOSPHOPROTEIN)                               | 6   | 0611-80 |
| ULIP3 (collapsin response mediator 1)                           | 6   | 0251-32 |
| RAF PROTO-ONCOGENE SERINE/THREONINE-PROTEIN KINASE              | 5   | 2071-24 |
| ARF-directed GTPase activating protein ASAP1 (centaurin beta4)  | 5   | 2024-04 |
| RECEPTOR OF ACTIVATED PROTEIN KINASE C 1 (RACK1)                | 5   | 0171-70 |
| Rho family GTPase RhoA                                          | 4   | 2103-91 |
| 14-3-3 PROTEIN BETA (PROTEIN KINASE C INHIBITOR PROTEIN-1)      | 4   | 2082-41 |
| Dickkopf gene Dkk-3                                             | 4   | 2081-37 |
| G protein beta 36 subunit (transducin beta subunit 1/GNB1)      | 4   | 2062-52 |
| mab-21 homolog MAB21L2                                          | 4   | 0271-42 |
| GUANINE NUCLEOTIDE-BINDING PROTEIN G(S) ALPHA SUBUNIT           | 4   | 0264-34 |
| GUANINE NUCLEOTIDE-BINDING PROTEIN G(I) ALPHA-2 SUBUNIT         | 4   | 0244-53 |
| COP9 complex subunit 3 (SGN3)                                   | 4   | 0102-51 |
| EGF repeat transmembrane protein DBI-1 (related to the notch)   | 3   | 2122-70 |
| GTPase activating protein ID-GAP                                | 3   | 2102-35 |
| regulator of Notch signaling manic fringe                       | 3   | 2081-77 |
| repulsive guidance receptor Roundabout (Robo2/KIAA1568)         | 3   | 2051-28 |
| SMOOTHENED HOMOLOG (SMO)                                        | 3   | 0824-65 |
| RAB GDP DISSOCIATION INHIBITOR ALPHA (GDI-1)                    | 3   | 0691-19 |
| ECSIT (evolutionarily conserved signaling intermediate in Toll) | 3   | 0613-39 |
| 14-3-3 PROTEIN ZETA/Delta (PROTEIN KINASE C INHIBITOR PROTEIN)  | 3   | 0263-25 |
| collapsin response mediator protein 5 (Crmp5)                   | 3   | 0252-33 |
| adenyl cyclase-associated protein (CAP)                         | 3   | 0241-37 |
| G PROTEIN BETA 2 SUBUNIT (TRANSDUCIN BETA CHAIN 2)              | 3   | 0221-26 |
| taipoxin-associated calcium binding protein-49 (ERC-55)         | 3   | 0194-87 |
| 14-3-3 protein eta                                              | 3   | 0192-58 |
| INTERFERON-RELATED DEVELOPMENTAL REGULATOR (IFRD1/TIS7)         | 3   | 0183-67 |
| Ras-related GTP-binding protein Rheb                            | 3   | 0113-38 |
| 14-3-3 protein gamma-subtype                                    | 3   | 0082-11 |
| Drosophila pair-rule gene odz/Tenm homolog ODZ3                 | 3   | 0052-06 |
| guanine nucleotide-binding regulatory protein gamma-3 subunit   | 2   | 2114-57 |
| regulator of G-protein signaling (RGS-r/RGS16)                  | 2   | 2111-45 |
| Arl2 binding protein BART1 (binds Arf-like 2 protein)           | 2   | 2103-44 |
| NEDD5/SEPTIN 2 PROTEIN                                          | 2   | 2101-30 |
| Borg4 (binder of Rho GTPases 4)                                 | 2   | 2071-11 |
| CDC42 protein                                                   | 2   | 2051-03 |
| Flt3 interacting zinc finger protein Fiz1                       | 2   | 2042-62 |
| RasGAP SH3-binding protein 2 (G3BP2)                            | 2   | 2011-50 |
| putative GAP protein E6TP1 (SPA-1 like protein p1294)           | 2   | 2011-04 |
| disintegrin-metalloprotease MADM/kuzbanian homolog              | 2   | 0824-70 |
| TRAF6-binding protein T6BP/tax1-binding protein TXBP151         | 2   | 0692-82 |
| candidate tumor suppressor protein DICE1 (contains EGF repeat)  | 2   | 0274-08 |
| RAS-RELATED PROTEIN RAB14                                       | 2   | 0272-40 |
| Nogo-A/Reticulon 4-A (a potent inhibitor of neurite growth)     | 2   | 0244-77 |
| rhotekin (binds to p21/rho and inhibits its GTPase activity)    | 2   | 0244-09 |
| mab-21 homolog MAB21L1/CAGR1                                    | 2   | 0243-07 |

Table S2. Continued

|                                                                 |   |         |
|-----------------------------------------------------------------|---|---------|
| CYCLIN-DEPENDENT KINASE 5 REGULATORY SUBUNIT 1 (P35/CDK5)       | 2 | 0241-91 |
| AXIN 1 (FUSED/AXIS INHIBITION PROTEIN 1)                        | 2 | 0241-11 |
| ADP-ribosylation factor 1-directed GTPase activating protein    | 2 | 0234-93 |
| J KAPPA RS-BINDING PROTEIN (SUPPRESSOR OF HAIRLESS)             | 2 | 0233-07 |
| RAS-RELATED PROTEIN RAL-A                                       | 2 | 0231-71 |
| Numb protein                                                    | 2 | 0224-39 |
| REGULATOR OF G-PROTEIN SIGNALING 12 (RGS12)                     | 2 | 0194-64 |
| GTP-binding regulatory protein gamma                            | 2 | 0191-74 |
| TUBERIN (TUBEROUS SCLEROSIS 2 HOMOLOG)                          | 2 | 0183-44 |
| ALPHA-1 CATENIN (102 KDA CADHERIN-ASSOCIATED PROTEIN)           | 2 | 0183-16 |
| NF2/MERLIN (SCHWANNOMIN)                                        | 2 | 0172-39 |
| tomoregulin/M7365 (contains follistatin modules and EGF domain) | 2 | 0171-02 |
| FOLLISTATIN-RELATED TGF-BETA-INDUCIBLE PROTEIN TSC-36           | 2 | 0124-29 |
| guanine nucleotide binding protein gamma-5 subunit              | 2 | 0122-57 |
| 65 KDA YES-ASSOCIATED PROTEIN (YAP65)                           | 2 | 0121-16 |
| COP9 complex subunit 6                                          | 2 | 0114-16 |
| calmodulin III (Calm3)                                          | 2 | 0112-21 |
| RAN-SPECIFIC GTPASE-ACTIVATING PROTEIN (RANBP1)                 | 2 | 0101-54 |
| guanine nucleotide-binding protein ragA                         | 2 | 0084-85 |
| CADHERIN-RELATED TUMOR SUPPRESSOR HOMOLOG (FAT)                 | 2 | 0081-03 |
| RAS GTPASE-ACTIVATING-LIKE PROTEIN IQGAP1 (P195)                | 2 | 0051-91 |
| plexin 2                                                        | 1 | 2123-63 |
| CD81 ANTIGEN (26KD CELL SURFACE PROTEIN TAPA-1)                 | 1 | 2123-54 |
| GAP-binding protein Tid-1 (a DnaJ/Tid56 homolog)                | 1 | 2122-15 |
| EMBRYONAL FYN-ASSOCIATED SUBSTRATE (SRC-INTERACTING PROTEIN)    | 1 | 2121-84 |
| PHOSPHATIDYLINOSITOL 3-KINASE CATALYTIC SUBUNIT (P110 BETA)     | 1 | 2121-31 |
| kappa B-ras 2 (regulates the degradation of ikappaB)            | 1 | 2114-27 |
| Trad/Duet/KALIRIN-12a serine/threonine kinase                   | 1 | 2114-09 |
| GTPase activating protein Nadrin                                | 1 | 2112-90 |
| TRAF and TNF receptor-associated protein (TTRAP)                | 1 | 2112-54 |
| PKC-zeta-interacting protein (ZIP)                              | 1 | 2112-31 |
| TGF-beta receptor associated protein STRAP (recruits Smad7)     | 1 | 2112-11 |
| DIACYLGLYCEROL KINASE ETA (DGK-ETA)                             | 1 | 2111-76 |
| suppressor of cytokine signalling-5 SOCS-5                      | 1 | 2111-51 |
| Stat3-interacting protein StIP1                                 | 1 | 2102-16 |
| tetraspanin CD82/KAI-1/IA4 (a TM4SF protein)                    | 1 | 2094-77 |
| semaphorin subclass 4 member G (sema4g/KIAA1619)                | 1 | 2083-05 |
| MAP kinase-activating death domain protein MADD/DENN            | 1 | 2082-91 |
| ras-related small GTPase RAB18                                  | 1 | 2082-75 |
| PHOSPHOLIPASE C-BETA-3 (PLC-BETA-3/PLCB3)                       | 1 | 2082-38 |
| TNF receptor associated factor 4 (TRAF4)                        | 1 | 2081-94 |
| RAS-RELATED PROTEIN RAB24 (RAB-16)                              | 1 | 2081-83 |
| RHO-RELATED GTP-BINDING PROTEIN RHO7                            | 1 | 2074-49 |
| GTP-binding protein RAB21                                       | 1 | 2074-48 |
| regulator of G-protein signaling 2 (RGS2)                       | 1 | 2074-31 |
| RAS GTPASE-ACTIVATING-LIKE PROTEIN IQGAP1 related               | 1 | 2073-23 |
| SYNDECAN-3/N-syndecan (CELL SURFACE PROTEOGLYCAN)               | 1 | 2071-69 |
| SOCS box-containing WD protein SWIP-2/WSB-2                     | 1 | 2071-67 |
| NEUROFILIN-1 (A5 PROTEIN BINDS SEMAPHORIN 3A and VEGF165)       | 1 | 2071-25 |
| RAS-RELATED PROTEIN R-RAS2 (RAS-LIKE PROTEIN TC21)              | 1 | 2064-04 |
| B-ind1 protein (participates in Rac1 signaling)                 | 1 | 2063-32 |
| beta-catenin-interacting protein ICAT (regulate Wnt signaling)  | 1 | 2063-08 |
| GROWTH FACTOR RECEPTOR-BOUND PROTEIN 10 (GRB10 ADAPTOR PROTEIN) | 1 | 2062-38 |
| PKR-associating protein RAX/PACT (activator of PKR kinase)      | 1 | 2061-70 |
| RAS-RELATED PROTEIN RAB28 (RAB-26)                              | 1 | 2054-59 |
| phosphatidylinositol 3-kinase p170/cpk-m                        | 1 | 2054-29 |

Table S2. Continued

|                                                                 |   |         |
|-----------------------------------------------------------------|---|---------|
| PDZ protein TIP-1 (interacts with the rho effector rhotekin)    | 1 | 2052-42 |
| RhoGEF ARHGEF4/KIAA1112 related gene                            | 1 | 2051-61 |
| Ras GAP-binding phosphoprotein of 190kD (p190-A)                | 1 | 2051-48 |
| A-kinase anchor protein (AKAP100)                               | 1 | 2044-94 |
| PHOSPHATIDYLINOSITOL 3-KINASE CATALYTIC SUBUNIT ALPHA ISOFORM   | 1 | 2042-70 |
| GTP-binding protein G-septin/septin 3 (GTPase)                  | 1 | 2041-12 |
| GRIP-associated protein 1 (GRASP-1/a neuronal RasGEF)           | 1 | 2034-57 |
| neuroglycan C (NGC/HEPARAN SULFATE PROTEOGLYCAN)                | 1 | 2034-10 |
| Homer/vesl family protein homer-3                               | 1 | 2032-16 |
| p120 catenin (p120ctn/CTNND1)                                   | 1 | 2032-06 |
| cell-polarity protein Par6 (binds Cdc42 and Rac1)               | 1 | 2031-77 |
| Plenty of SH3s (POSH/Rac-binding protein)                       | 1 | 2024-53 |
| Rab6 GTPase activating protein GAPCenA                          | 1 | 2023-82 |
| RAS-RELATED PROTEIN RAB-35 (RAB-1C/RAY)                         | 1 | 2023-37 |
| nucleolar GTPase/AUTOANTIGEN NGP-1                              | 1 | 2021-39 |
| Activator of G protein signaling 3 (AGS3/a GDI protein)         | 1 | 2013-90 |
| suppressor of cytokine signalling-2 SOCS-2                      | 1 | 0824-17 |
| N-CHIMAERIN (N-CHIMERIN/GTPASE ACTIVATING PROTEIN FOR P21-RAC)  | 1 | 0823-05 |
| TRIPLE FUNCTIONAL DOMAIN PROTEIN/PTPRF INTERACTING PROTEIN      | 1 | 0822-89 |
| TRAF-interacting protein I-TRAF/TANK                            | 1 | 0822-38 |
| RAS-RELATED C3 BOTULINUM TOXIN SUBSTRATE 1 (P21-RAC1)           | 1 | 0822-22 |
| SYNDECAN-1 (CELL SURFACE PROTEOGLYCAN)                          | 1 | 0821-93 |
| EPH-RELATED RECEPTOR TYROSINE KINASE LIGAND (ELF-1/CEK7-L)      | 1 | 0821-17 |
| signal transducing adaptor molecule STAM                        | 1 | 0694-86 |
| NEUROGENIC LOCUS NOTCH HOMOLOG PROTEIN 4 (NOTCH4/INT-3)         | 1 | 0692-10 |
| TRANSMEMBRANE PROTEIN SEX (PLEXIN 4)                            | 1 | 0612-01 |
| guanylate binding protein (GUANINE NUCLEOTIDE-BINDING PROTEIN)  | 1 | 0611-30 |
| formin-2/Fmn2 (LIMB DEFORMITY PROTEIN cappuccino)               | 1 | 0273-82 |
| Notch signalling regulator deltex                               | 1 | 0272-63 |
| centrosomal A-kinase anchoring protein AKAP450                  | 1 | 0271-62 |
| EPHRIN-B1 (EPH-RELATED RECEPTOR TYROSINE KINASE LIGAND 2/STRA1) | 1 | 0262-63 |
| GUANINE NUCLEOTIDE-BINDING PROTEIN G(Z) ALPHA SUBUNIT           | 1 | 0262-56 |
| membrane-associated guanylate kinase CASK/LIN-2                 | 1 | 0262-52 |
| GTPASE-ACTIVATING PROTEIN (GAP/P120GAP)                         | 1 | 0261-34 |
| Smad6                                                           | 1 | 0261-28 |
| TRANSMEMBRANE 4 SUPERFAMILY (TETRASPANIN 6/TM4SF-A15)           | 1 | 0253-62 |
| A kinase anchor protein AKAP-KL                                 | 1 | 0251-45 |
| CRK-LIKE PROTEIN CRKL (SH2/SH3 adaptor protein)                 | 1 | 0251-11 |
| BETA-ARRESTIN 2                                                 | 1 | 0251-07 |
| Cas and HEF1 associated signal transducer Chat                  | 1 | 0251-04 |
| SYNDECAN-2 PRECURSOR (FIBROGLYCAN/HEPARAN SULFATE PROTEOGLYCAN) | 1 | 0244-90 |
| phosphatidylinositol 3-kinase adaptor protein p150              | 1 | 0244-23 |
| reelin                                                          | 1 | 0243-03 |
| SGN2/TRIP15/COPS2 of the COP9/Signalosome complex               | 1 | 0241-75 |
| RAS-RELATED PROTEIN RAP-1B (GTP-BINDING PROTEIN SMG P21B)       | 1 | 0234-44 |
| phosphorylated GTPgammaS-G(z)alpha binding protein GRIN1        | 1 | 0234-17 |
| liprin-alpha2 (LAR-interacting protein)                         | 1 | 0233-56 |
| REGULATOR OF G-PROTEIN SIGNALING 5 (RGS5)                       | 1 | 0233-29 |
| cornichon                                                       | 1 | 0231-52 |
| NUCLEOBINDIN/Calnuc (an EF-hand Ca binding protein)             | 1 | 0224-11 |
| RAS-RELATED PROTEIN RAH (low-molecular-weight G-protein)        | 1 | 0223-01 |
| guanine nucleotide exchange factor (SON OF SEVENLESS/SOS-1)     | 1 | 0221-79 |
| PROTO-ONCOGENE TYROSINE-PROTEIN KINASE FES/FPS                  | 1 | 0193-88 |
| mouse homolog of the Drosophila Disabled (mDab1)                | 1 | 0193-43 |
| regulator of G-protein signaling RGS17/Rgsz2                    | 1 | 0192-87 |
| GUANINE NUCLEOTIDE DISSOCIATION STIMULATOR RALGDS FORM A        | 1 | 0184-15 |

Table S2. Continued

|                                                               |   |         |
|---------------------------------------------------------------|---|---------|
| Trio guanine nucleotide exchange factor                       | 1 | 0181-38 |
| Ras GTPase-activating protein                                 | 1 | 0181-19 |
| P58IPK-interacting protein P52rIPK (regulator of PKR)         | 1 | 0173-83 |
| related to SEMAPHORIN 6A (SEMA Q)                             | 1 | 0172-35 |
| phosducin-like protein                                        | 1 | 0123-15 |
| cyclin-dependent kinase 5 CDK5 (PSSALRE kinase)               | 1 | 0122-86 |
| SEGMENT POLARITY PROTEIN DISHEVELLED HOMOLOG DVL-2            | 1 | 0121-87 |
| proto-oncogene P21/c-K-ras                                    | 1 | 0121-43 |
| NEUROGENIC LOCUS NOTCH HOMOLOG (MOTCH/NOTCH1)                 | 1 | 0113-53 |
| PINCH PROTEIN (Integrin-linked kinase binding protein)        | 1 | 0111-36 |
| PROTO-ONCOGENE C-CRK                                          | 1 | 0104-74 |
| ARF GTPase-activating protein GIT1                            | 1 | 0104-44 |
| UNC-13 homolog Munc13-2                                       | 1 | 0101-72 |
| AUTOSOMAL DOMINANT POLYCYSTIC KIDNEY DISEASE PROTEIN 1 (PKD1) | 1 | 0101-19 |
| ADP-ribosylation factor GTPase-activating protein (ARFGAP1)   | 1 | 0082-31 |
| cornichon-like protein                                        | 1 | 0081-63 |
| ATRIAL NATRIURETIC PEPTIDE RECEPTOR B/guanylyl cyclase        | 1 | 0051-71 |
| guanine nucleotide-binding protein rhoB                       | 1 | 0051-36 |
